# Supplementary material for: Vapour-adsorption and chromic behaviours of luminescent coordination polymers composed of a Pt(ii)-diimine metalloligand and alkaline-earth metal ions
Source: Royal Society of Chemistry journal article supplement (doi:10.1039/c1dt10518c), 2011-01-01
Supplement: c1dt10518c.pdf [file c1dt10518c.pdf]

## Vapour-Adsorption and Chromic Behaviours of Luminescent Coordination Polymers Composed of a Pt(II)-Diimine Metalloligand and Alkaline-Earth Metal Ions

Hirofumi Hara,<sup>a</sup> Atsushi Kobayashi,<sup>\*a</sup> Shin-ichiro Noro,<sup>b</sup> Ho-Chol Chang<sup>a</sup> and Masako Kato<sup>\*a</sup>

<sup>a</sup> Division of Chemistry, Faculty of Science, Hokkaido University, North-10 West-8, Kita-ku, Sapporo 060-0810, Japan.

<sup>b</sup> Research Institute for Electronic Science, Hokkaido University, North-20, West-10, Kita-ku, Sapporo 001-0020, Japan

### Supporting Information

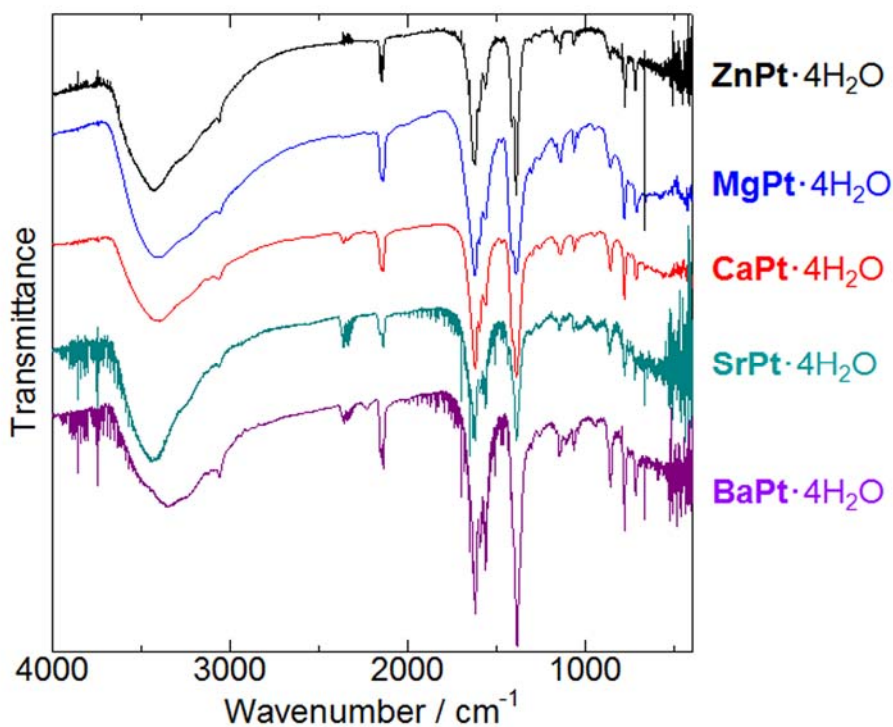

**Figure S1.** IR spectra of **MPt·4H<sub>2</sub>O** at room temperature.

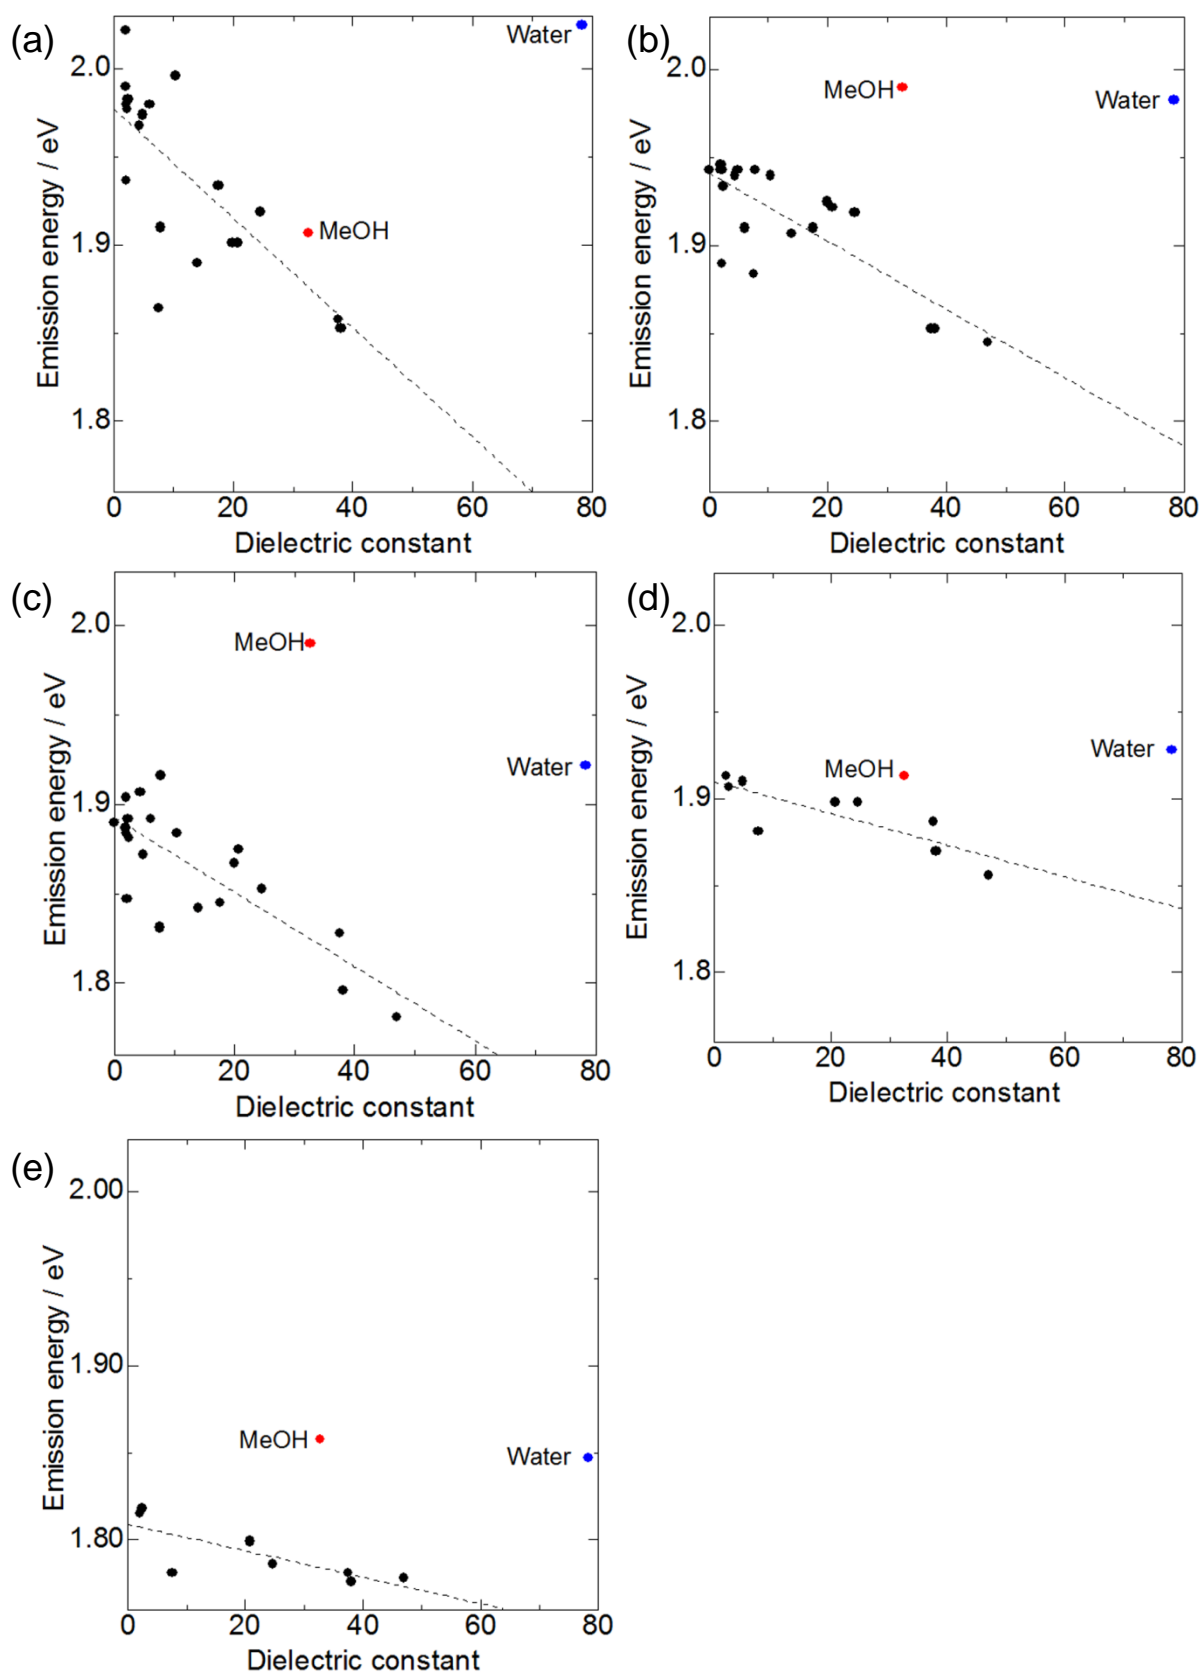

**Figure S2.** Plots of the emission energies of (a) **ZnPt·4H<sub>2</sub>O**, (b) **MgPt·4H<sub>2</sub>O**, (c) **CaPt·4H<sub>2</sub>O**, (d) **SrPt·4H<sub>2</sub>O**, (e) **BaPt·4H<sub>2</sub>O** against dielectric constants of the soaking liquids. The dotted lines are drawn as a guide.

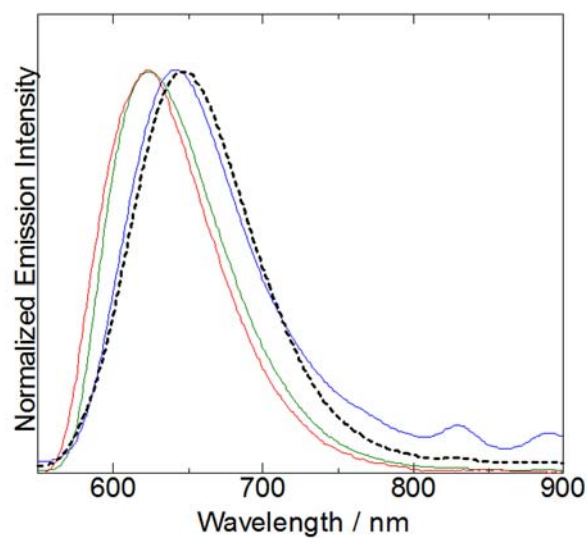

**Figure S3.** Emission spectra of **CaPt·4H<sub>2</sub>O** in air (black dotted line), immersed in 100% MeOH (green line), in mixed liquid (90:10 = MeOH:water; blue line) and **CaPt·0H<sub>2</sub>O** upon exposure to MeOH vapor at room temperature (red line).

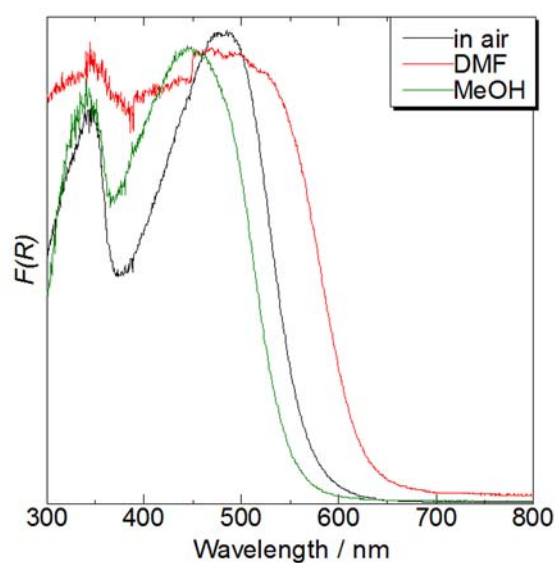

**Figure S4.** UV-Vis diffuse reflectance spectra of **MgPt·4H<sub>2</sub>O**. Black, red and green lines show the spectra in air, immersed in DMF and MeOH, respectively.

---

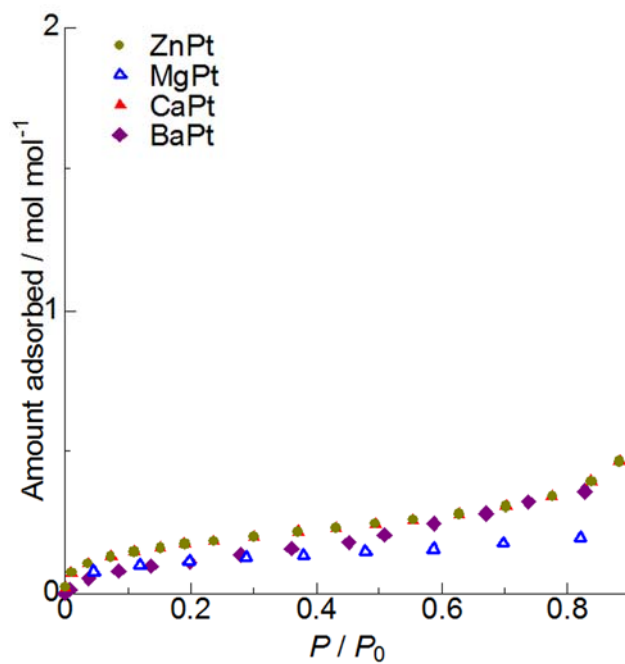

**Figure S5.** EtOH vapour-adsorption isotherms of **MPt**·0H<sub>2</sub>O at 298 K.

---
